# Supplementary material for: Vaccines safety and maternal knowledge for enhanced maternal immunization acceptability in rural Uganda: A qualitative study approach
Source: PubMed Central journal article supplement (PMC7728220; doi:10.1371/journal.pone.0243834), 2020-12-10
Supplement: pone.0243834.s005.pdf [file pone.0243834.s005.pdf]

## Codebook for Analysis

| Themes                               | Sub-themes                                         | CODES                              | Meaning                                                                                                                                            |                                                             |
|--------------------------------------|----------------------------------------------------|------------------------------------|----------------------------------------------------------------------------------------------------------------------------------------------------|-------------------------------------------------------------|
| Knowledge about maternal vaccination | Correct knowledge                                  | Know_Cor_prev_Mother               | Correct knowledge that vaccines prevent mothers from diseases like Tetanus                                                                         |                                                             |
|                                      |                                                    | Know_Cor_Prev_Baby                 | Correct knowledge that vaccines prevent children from diseases e.g. measles, tetanus and correct information about immunization improving immunity |                                                             |
|                                      |                                                    | Know_CC_Vac                        | Knowledge of cervical cancer vaccine                                                                                                               |                                                             |
|                                      |                                                    | Know_Hep.B_Vac                     | Knowledge of Hepatitis B vaccine                                                                                                                   |                                                             |
|                                      | Wrong Knowledge                                    | Know_Wrg_dfd_Baby                  | Wrong/ Incorrect Knowledge/information about vaccination that it prevents delivery of deformed babies                                              |                                                             |
|                                      |                                                    | Know_Wrg_Malaria                   | Incorrect knowledge that vaccination prevents malaria                                                                                              |                                                             |
|                                      |                                                    | Know_Wrg_Weakness                  | Wrong info/knowledge that vaccination protects from general body weakness                                                                          |                                                             |
|                                      | No knowledge                                       | Noknow_Vac                         | Lack of knowledge about vaccination e.g. which vaccine is given and when                                                                           |                                                             |
|                                      | Attitudes and beliefs towards Maternal Vaccination | Health system/ Environment factors | NoVac_Poor_attd_H/W                                                                                                                                | Harsh/abusive /unbothered health workers & long stay at H/F |
|                                      |                                                    |                                    | NoVac_trspt                                                                                                                                        | Long distances and lack of transport                        |
| Individual factors                   |                                                    | NoVac_Reluc                        | Because of reluctance e.g some keep postponing. some say since i deliver from home, no ANC need doing & other chores like gardening                |                                                             |
|                                      |                                                    | NoVac_HIVtest                      | Fear of testing for HIV                                                                                                                            |                                                             |
|                                      |                                                    | NoVac_men                          | Being stopped by men for due to over crying at night after vaccination, fear of death of the child                                                 |                                                             |
|                                      |                                                    | NoVac_fear_Expry                   | Fear of being injected expired vaccines and wrong drugs                                                                                            |                                                             |
|                                      |                                                    | NoVac_fear_Side Effect             | Fear of side effects: becoming lame, unable to lift arm after injection                                                                            |                                                             |
|                                      |                                                    | NoVac_fear_inject                  | Fear of injections/ tablets                                                                                                                        |                                                             |
|                                      |                                                    | NoVac_notSick                      | No need for vaccination as they don't feel sick                                                                                                    |                                                             |
|                                      |                                                    | NoVac_trdmed/hlrs_reli             | Opt for traditional healers/herbal medicine & some religious faith e.g. born again "Nngiri nkalu" prohibit and TBAs                                |                                                             |
|                                      |                                                    | NoVac_Maternity Dress              | Husbands' failure to buy maternity dresses and escorting them                                                                                      |                                                             |

| Themes                                 | Sub-themes                                     | CODES                      | Meaning                                                                                      |
|----------------------------------------|------------------------------------------------|----------------------------|----------------------------------------------------------------------------------------------|
|                                        | Worries about AEFI for Maternal vaccination    | NoVac_sid_eff_fever        | Side effect: child injected, got fever                                                       |
|                                        |                                                | NoVac_sid_eff_wound        | Side effect: injected and area developed pus/became wound                                    |
|                                        |                                                | NoVac_sid_eff_disabled     | Side effect: injected and child became disabled                                              |
|                                        |                                                | NoVac_sid_eff_Parlysd+pain | Side effect of painful paralyzed are of injection                                            |
|                                        |                                                | NoVac_side effects death   | Side effect of death after vaccination                                                       |
| Experiences with Maternal Vaccination  | Schedule                                       | Exp_Schd_Busy              | The schedule is busy                                                                         |
|                                        |                                                | Exp_Schd_ltd               | The time schedule is limited and not convenient                                              |
|                                        |                                                | Exp_Schd_convinient        | The schedule and the time is enough and convenient                                           |
|                                        | Maternal Vaccination logistics and Amenities   | Exp_Vac_refrige            | Not vaccinated due to faulty refrigerator                                                    |
|                                        |                                                | Exp_Vac_Stockout           | Not vaccinated due to drug/vaccine stock outs                                                |
|                                        |                                                | Exp_poorSan                | Experience of poor sanitation at facility; dirty toilets                                     |
|                                        |                                                | Exp_Vac_prescribed         | Prescribe for you in the book to buy if no drugs                                             |
|                                        | Experiences of Vaccination with Health Workers | Exp_lngWaiting time        | Experience of long waiting hours                                                             |
|                                        |                                                | Exp_Rude_H/W               | Experience with harsh/ rude/abusive health workers                                           |
|                                        |                                                | Exp_good trt               | Experience of good treatment by the health workers (especially when you go early)            |
|                                        |                                                | Exp_no H/W                 | Experience of finding no health workers around: when they have left especially after mid-day |
|                                        |                                                | Exp_H/W_bribe              | Experience some health workers favoring bribe                                                |
|                                        |                                                | Exp_NoVac_late             | Experience of not being vaccinated by health workers because of reaching late                |
| Readiness to receive Maternal vaccines | Readiness & willingness & Issues of concern    | NewVac_Ready_no problem    | Ready to take up the vaccine (majority kept on insisting if it has no problem)               |
|                                        |                                                | NewVac_NoReady_wait        | First wait for other people to be vaccinated                                                 |
|                                        |                                                | NewVac_diff Btn O/N        | Need to know the difference btn new and old vaccine                                          |
|                                        |                                                | NewVac_Sen_Side eff.       | Need sensitization about the vaccine's side effects (preferably no side effect)              |
|                                        |                                                | NewVac_Import.             | Want to know what the vaccine cures/ prevents against/vaccine importance                     |
| Preference for delivery of Vaccine     | Preference for delivery of Vaccine             | Prefer_inject              | Prefer an injection                                                                          |
|                                        |                                                | Prefer_Mouth               | Prefer mouth drops                                                                           |
|                                        |                                                | Prefer_tabs                | Prefer tablets                                                                               |

| Themes                                            | Sub-themes                             | CODES           | Meaning                                                                                                            |
|---------------------------------------------------|----------------------------------------|-----------------|--------------------------------------------------------------------------------------------------------------------|
|                                                   |                                        | Prefer_H/F      | At facility level                                                                                                  |
|                                                   |                                        | Prefer_D2D      | Door to door                                                                                                       |
|                                                   |                                        | Prefer_Outreach | Community outreaches                                                                                               |
|                                                   |                                        | Prefer_Village  | At village level e.g. the chairperson's home, VHT                                                                  |
|                                                   |                                        | Dist_Long       | The distance is long                                                                                               |
|                                                   |                                        | Dist_short      | The distance is short                                                                                              |
|                                                   | Information sources                    | Info_VHTS       | VHTS                                                                                                               |
|                                                   |                                        | Info_Media      | Media e.g TV, RADIO                                                                                                |
|                                                   |                                        | Info_Opn ldrs   | Local council leaders e.g. The village women leader (nabakyaala)                                                   |
|                                                   |                                        | Info_Frds       | Friends                                                                                                            |
|                                                   |                                        | Info_Soc_gather | Social gatherings like burials                                                                                     |
|                                                   |                                        | Info_H/W        | Health workers                                                                                                     |
|                                                   |                                        | Info_Dist       | HDSS from District offices                                                                                         |
|                                                   |                                        | Info_Van        | Moving vans/community mobilisers                                                                                   |
| Info_Wors_Places                                  | Religious leader and places of worship |                 |                                                                                                                    |
| Male/ partner involvement in maternal vaccination | Involvement of partners                | Part_enc_Vacc   | Partners encourage their pregnant women to go for vaccination                                                      |
|                                                   |                                        | Part_Sup_Vac    | Partners offer direct support to partners including transport and going with them for maternal vaccination and ANC |
|                                                   |                                        | Part_notSup_Vac | Partners are not engaged in direct support for pregnant women to vaccinate                                         |
|                                                   |                                        |                 | Partners worry about the side effects of maternal vaccines while citing experiences                                |
